# Supplementary material for: MOF–polymer enhanced compatibility: post-annealed zeolite imidazolate framework membranes inside polyimide hollow fibers
Source: Royal Society of Chemistry journal article supplement (doi:10.1039/c5ra26076k), 2016-01-01
Supplement: c5ra26076k1.pdf [file c5ra26076k1.pdf]

**ELECTRONIC SUPPLEMENTARY INFORMATION**

# MOF-polymer enhanced compatibility: post-annealed zeolite imidazolate framework membranes inside polyimide hollow fibers

*Fernando Cacho-Bailo,<sup>a</sup> Guillermo Caro,<sup>a</sup> Miren Etxeberria-Benavides,<sup>b</sup> Oğuz Karvan,<sup>b</sup> Carlos Téllez,<sup>a</sup>  
Joaquín Coronas<sup>a,\*</sup>*

<sup>a</sup>Chemical and Environmental Engineering Department and Instituto de Nanociencia de Aragón (INA),  
Universidad de Zaragoza, 50018 Zaragoza, Spain

<sup>b</sup>Tecnalia Research and Innovation, Energy and Environmental Division, 20009 Donostia-San Sebastián,  
Spain

**P84 hollow fiber fabrication procedure.** HF with an asymmetric morphology were spun using the dry jet, wet quench method.<sup>1</sup> Through a spinning process, a polymer solution (polymer, solvents, non-solvents, additives) was co-extruded with the bore fluid (a solvent-rich mixture of solvent and non-solvent) through a spinneret. When the extruded solution passed through the air gap, a skin layer formed due to the vaporization of the solvent with a high vapor pressure. Then the fiber reached the quench bath and a rapid phase separation occurred. A porous substructure was formed while the fiber travelled through the quench bath. After the quench bath, the fiber was wound onto a take-up drum and kept in the drum for further rinsing for 15-20 min. The fibers were removed from the drum, kept in DI water for four days for cleaning. Then they were solvent exchanged by means of three 30 min successive methanol baths followed by three 30 min hexane baths.<sup>2</sup> The last solvent (hexane) was removed by drying at 70 °C under vacuum overnight. The dope composition and fiber spinning conditions used in this work are shown in Table S1, comprising NMP (anhydrous N-methylpyrrolidone, Sigma-Aldrich, 99.5%) and EtOH (anhydrous ethanol, Prolabo). Co-polyimide P84 was generously supplied by HP Polymer GmbH. The parameters of the spinning process are given in Table S2. Additional details regarding the spinning process and principles can be found elsewhere.<sup>2,3</sup>

**ZIF@P84 membrane fabrication procedure.** ZIF-8 membranes were prepared mixing a 0.1 mol·L<sup>-1</sup> Zn(NO<sub>3</sub>)<sub>2</sub>·6H<sub>2</sub>O (Sigma Aldrich, 98%) solution with a 0.3 mol·L<sup>-1</sup> 2-N-methylimidazole (Sigma Aldrich, 99%) and sodium formate (NaCOOH, Sigma Aldrich, >99%) solution in methanol (Scharlab, 99.9%) at room temperature. The syntheses lasted 2.5 h, the final volume pumped through the hollow fiber being 15 mL. Finally, 2 mL of methanol were pumped for washing.

For the fabrication of ZIF-93 membranes (ZIF-93@P84), a 0.15 mol·L<sup>-1</sup> zinc nitrate hexahydrate solution (Zn(NO<sub>3</sub>)<sub>2</sub>·6H<sub>2</sub>O, Sigma-Aldrich, 98%) in water was mixed together with a 0.30 mol·L<sup>-1</sup> 4-methyl-5-imidazolecarboxaldehyde (C<sub>5</sub>H<sub>6</sub>N<sub>2</sub>O, Sigma-Aldrich, 99%) and 0.30 mol·L<sup>-1</sup> sodium formate (NaCOOH, Sigma-Aldrich, >99%) solution in methanol (Scharlab, 99.9%) as metal and ligand solutions, respectively.

The ZIF-93 membrane syntheses lasted 80 min at a total flow rate of 50  $\mu\text{L}/\text{min}$ , a total volume of 4 mL of the reagent solution being pumped. Finally, 2 mL of a distilled water were pumped for washing.

These conditions gave rise to a laminar flow within the P84 HF: dissolved reagent transfer was enhanced through the boundary layers towards the HF wall. A residence time ( $\tau$ ) of 7.7 s was calculated for the flow inside the fiber.

**Table S1.** Composition of the dope and the bore solutions used in the P84 HF spinning process.

|                       | Polymer solution [wt%] | Bore fluid [wt%] |
|-----------------------|------------------------|------------------|
| P84 (HP Polymer GmbH) | 28.5                   | -                |
| NMP                   | 62.4                   | 89.9             |
| DI water              | -                      | 10.1             |
| EtOH                  | 9.1                    | -                |

**Table S2.** Working conditions used in the P84 HF spinning process.

| Dope flow | Dope pressure | Bore flow | Bore fluid pressure | Spinneret temp. | Quench bath temp. | Air gap | Take up rate | Room temp. | Humidity |
|-----------|---------------|-----------|---------------------|-----------------|-------------------|---------|--------------|------------|----------|
| [mL/h]    | [atm]         | [mL/h]    | [atm]               | [°C]            | [°C]              | [cm]    | [m/min]      | [°C]       | [%]      |
| 180       | 10.9          | 60        | 0.1                 | 35              | 25                | 10      | 25           | 24         | 69       |

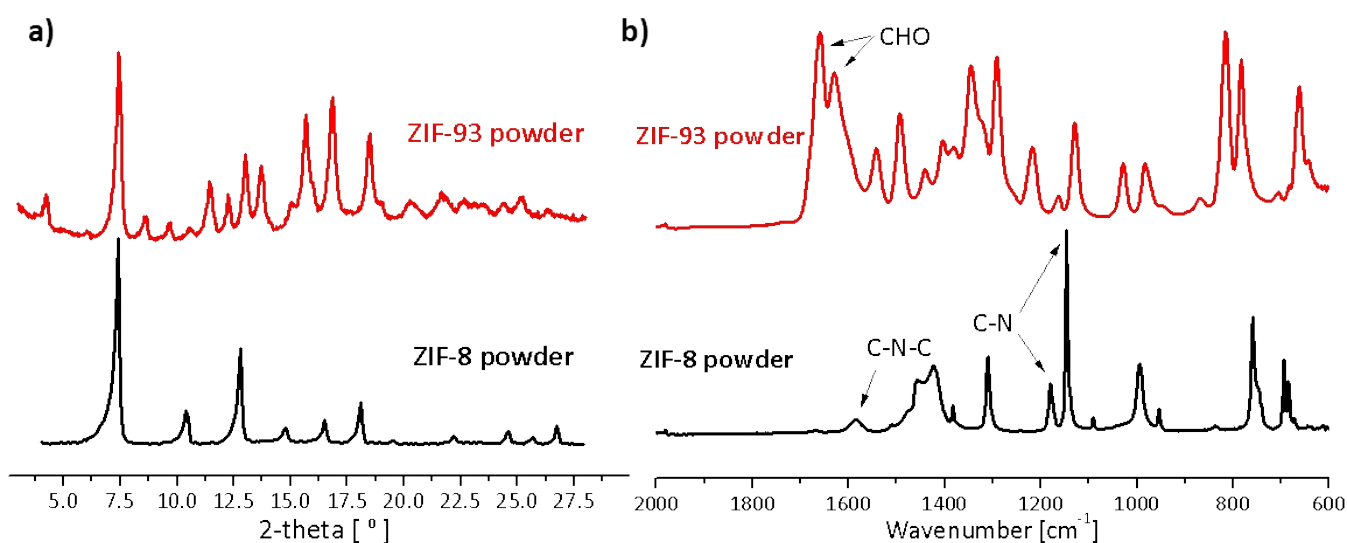

**Figure S1.** XRD (a) and FTIR (b) patterns of the ZIF-8 and ZIF-93 powders collected during the membrane syntheses and XRD pattern of a dissolved ZIF-93@P84 membrane.

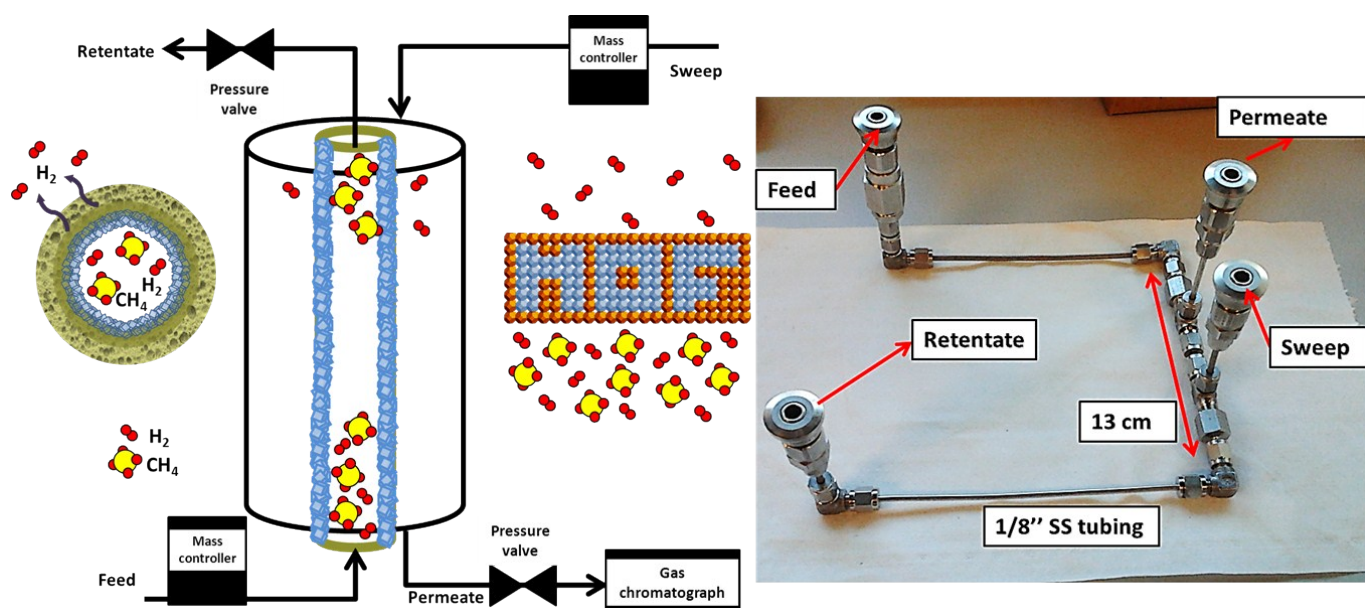

**Figure S2.** Gas plant scheme and experimental stainless-steel module used for HF membrane permeation tests. A 13 cm long HF is sealed with epoxy resin where an equimolar gas mixture to be separated is fed inside the fiber. The permeate stream is swept crosscurrent.

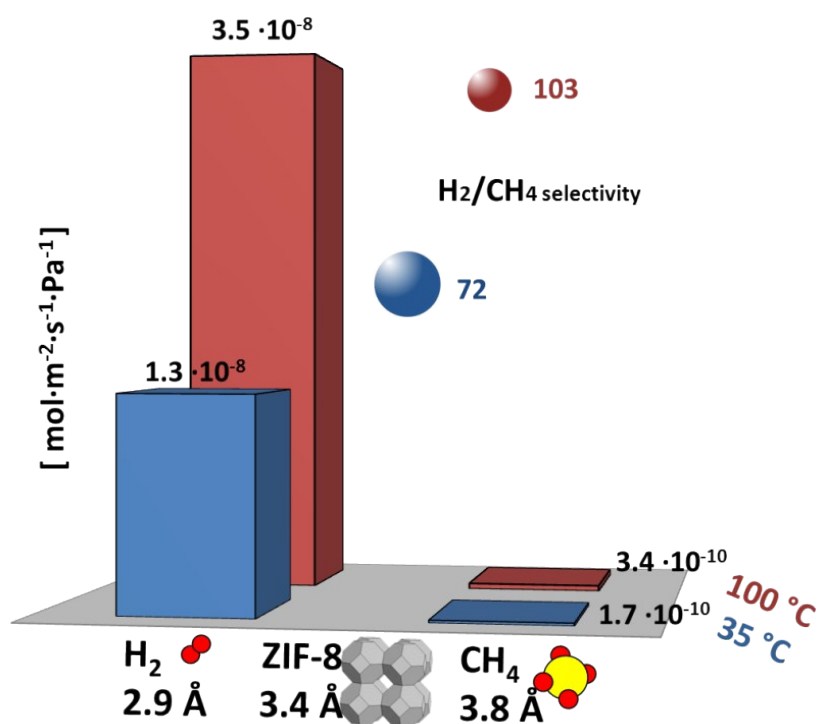

**Figure S3.** Averaged performance values of an *in situ* annealed ZIF-8@P84 HF membrane in H<sub>2</sub>/CH<sub>4</sub> mixture separation at 35 and 100 °C. Dots represent the mixture selectivities, whereas bars are permeances.

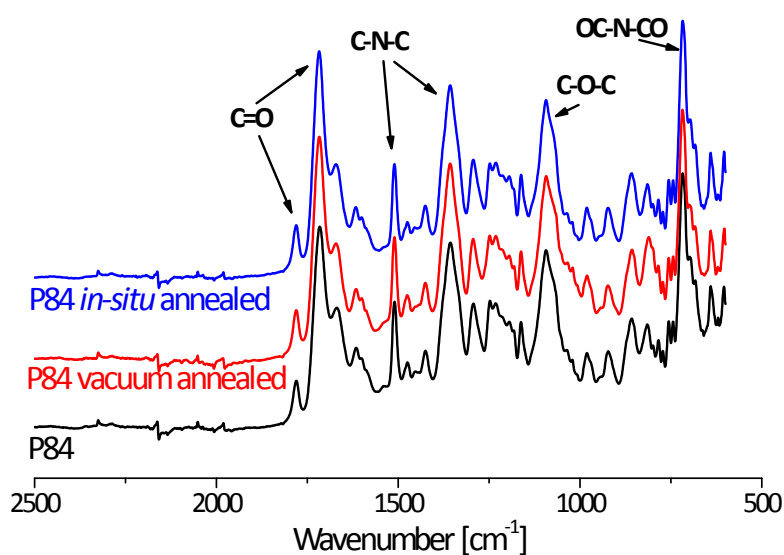

**Figure S4.** ATR-FTIR spectra of the *in situ* (B-type membrane) and vacuum (C-type membrane) annealed P84 HF supports compared with the bare P84 polymer (A-type membrane) support.

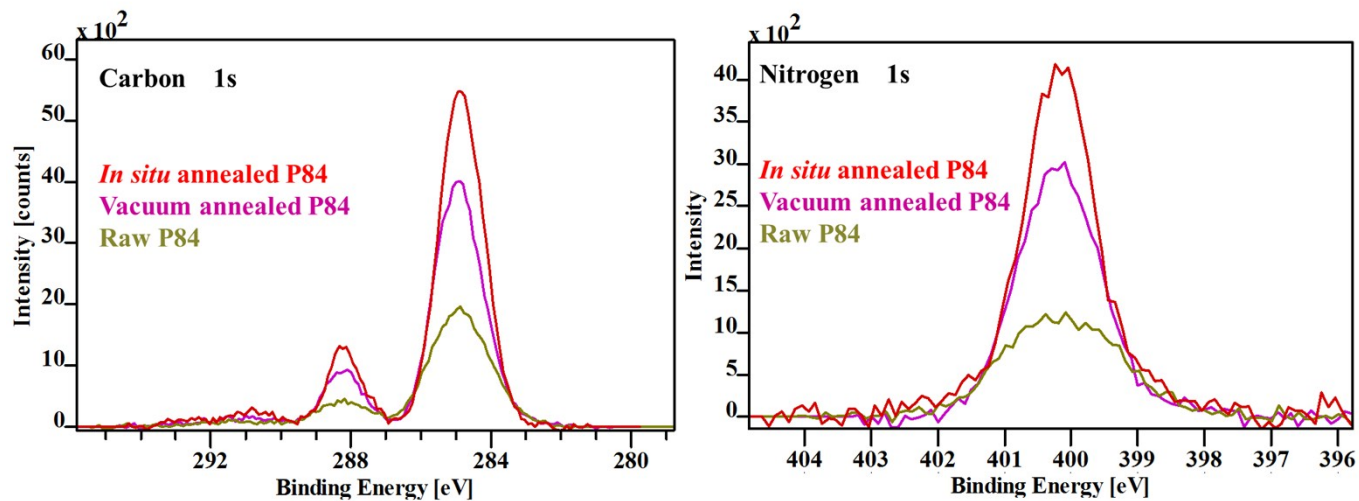

**Figure S5.** Carbon (1s) and nitrogen (1s) high resolution XPS spectra of the inner-surface of bare (A-type), vacuum annealed (C-type) and *in situ* annealed (B-type membrane) P84 HF supports.

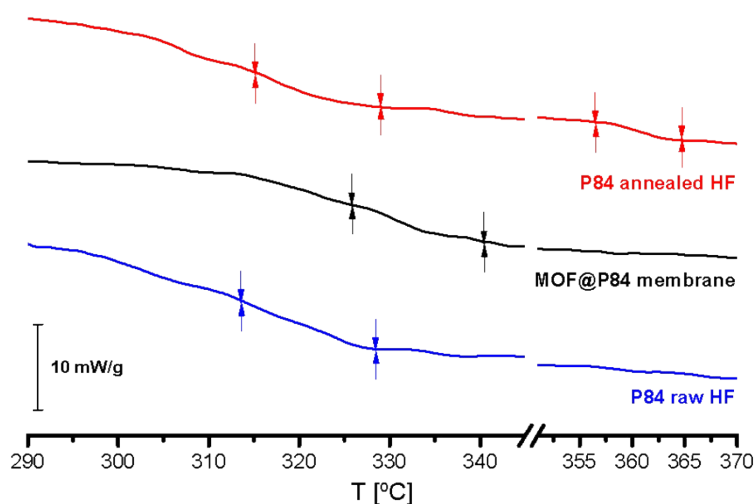

**Figure S6.** DSC curves of a MOF coated, raw and annealed P84 hollow fiber membranes carried out at 5 K·min<sup>-1</sup>. Inflection regions showing the glass transition temperatures of the polymeric materials are indicated.

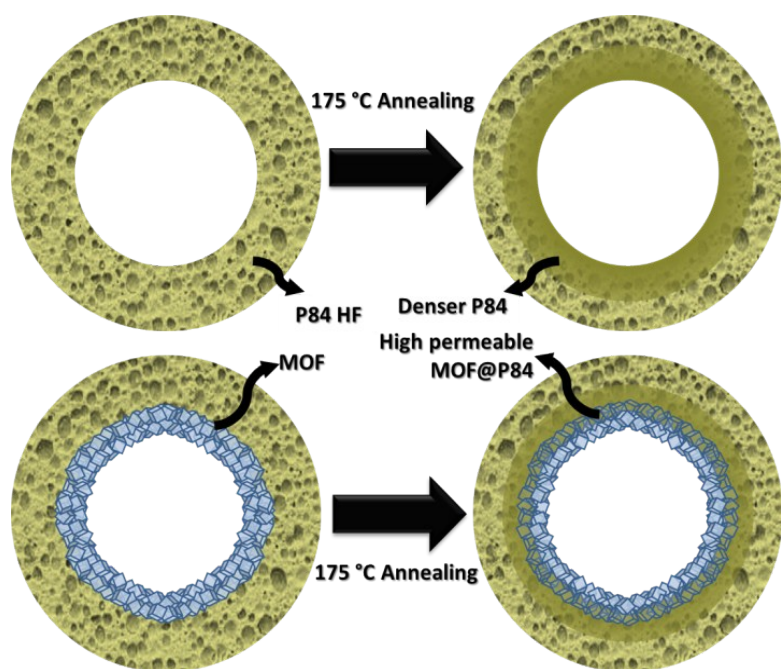

**Figure S7.** MOF-membrane schematic composition and hypothesized changes induced by the annealing treatment.

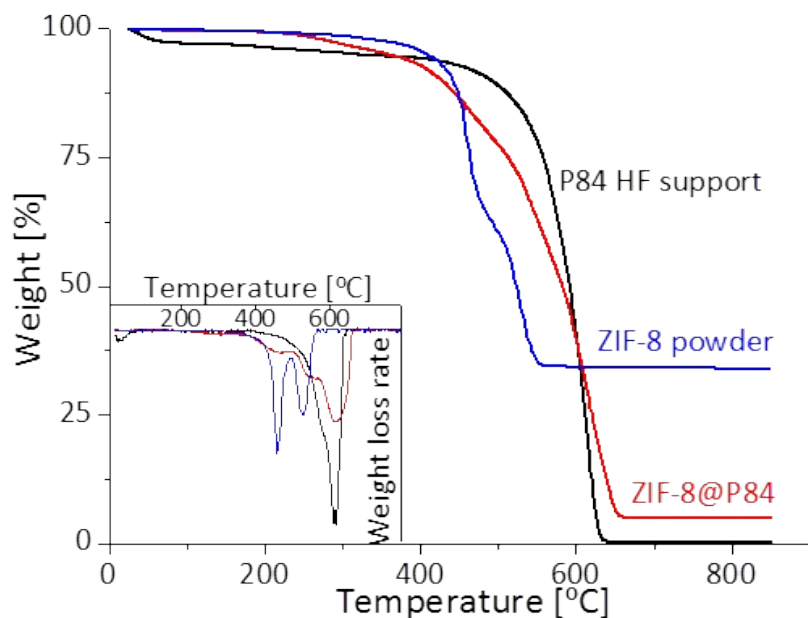

**Figure S8.** Weight loss curves in air atmosphere of ZIF-8 *in situ* annealed (G-type) membrane, compared with the pure P84 hollow fiber support and the collected MOF powder.

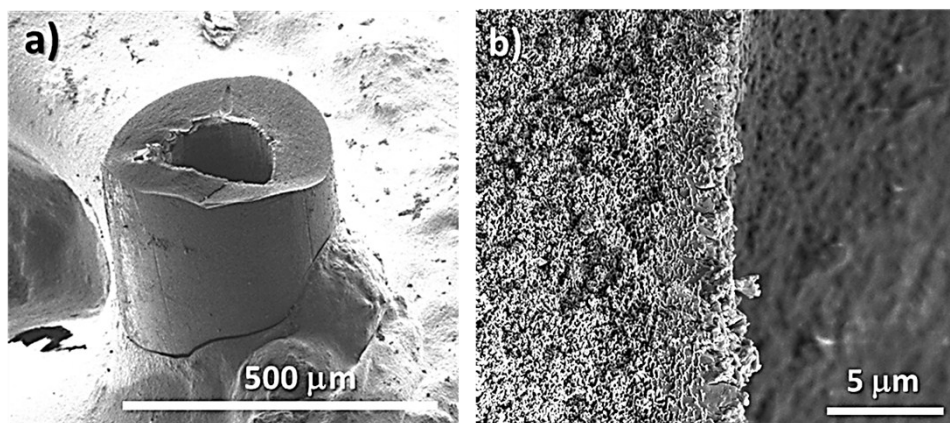

**Figure S9.** SEM cross-section images of the MOF-coated inner surface of an as-synthesized ZIF-93@P84 membrane.



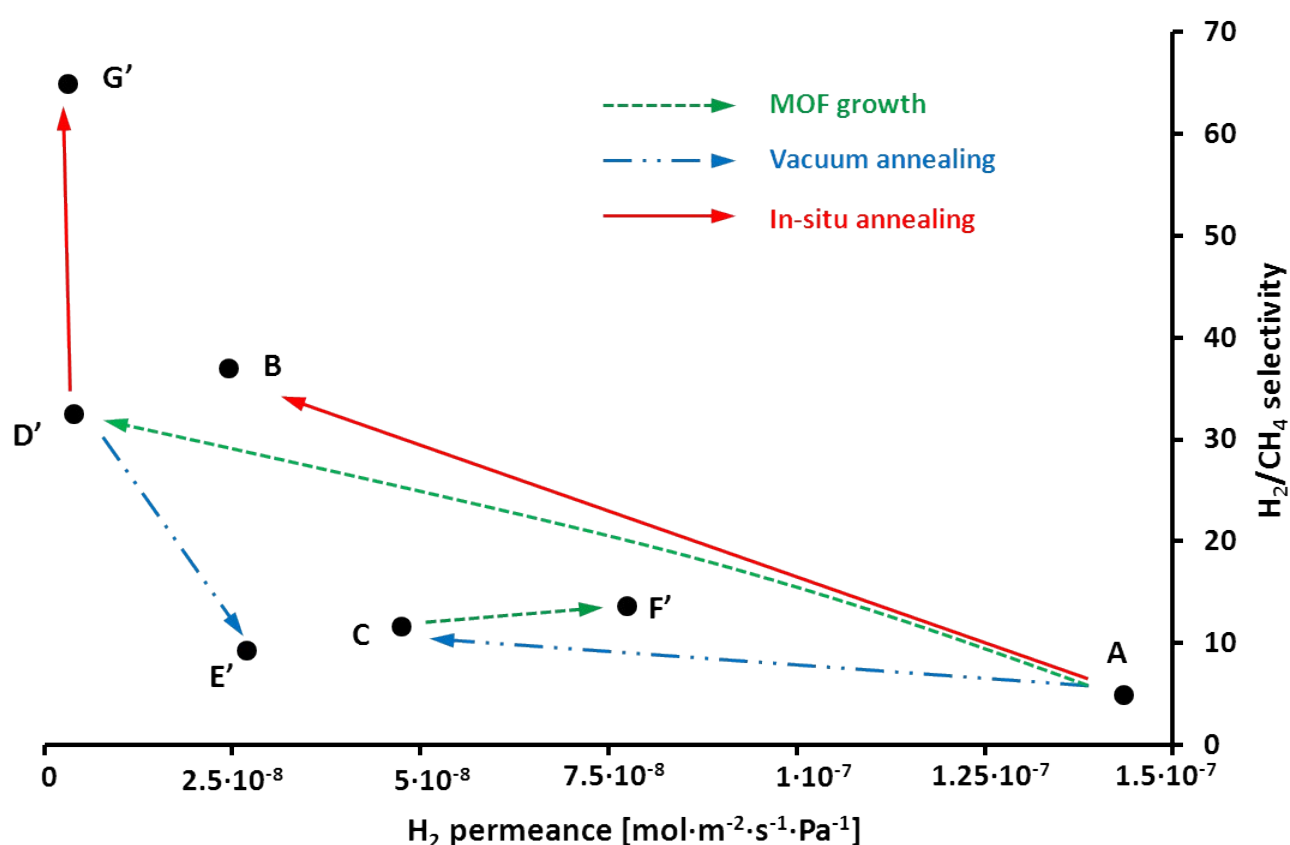

| Description of the membrane            | H <sub>2</sub> permeance                               |     | H <sub>2</sub> /CH <sub>4</sub> selectivity | CO <sub>2</sub> permeance                              |     | CO <sub>2</sub> /CH <sub>4</sub> selectivity |
|----------------------------------------|--------------------------------------------------------|-----|---------------------------------------------|--------------------------------------------------------|-----|----------------------------------------------|
|                                        | mol·m <sup>-2</sup> ·s <sup>-1</sup> ·Pa <sup>-1</sup> | GPU |                                             | mol·m <sup>-2</sup> ·s <sup>-1</sup> ·Pa <sup>-1</sup> | GPU |                                              |
| D' ZIF-93 @ P84 HF membrane            | 3.9·10 <sup>-9</sup>                                   | 12  | 32.4                                        | 1.0·10 <sup>-9</sup>                                   | 3.0 | 10.5                                         |
| E' Vacuum annealed D' membrane         | 2.7·10 <sup>-8</sup>                                   | 80  | 9.2                                         | 5.8·10 <sup>-9</sup>                                   | 17  | 2.1                                          |
| F' ZIF-93 @ C membrane                 | 7.7·10 <sup>-8</sup>                                   | 231 | 13.6                                        | 2.9·10 <sup>-8</sup>                                   | 86  | 5.1                                          |
| G' <i>In situ</i> annealed D' membrane | 3.3·10 <sup>-9</sup>                                   | 9.7 | 65.0                                        | 6.7·10 <sup>-10</sup>                                  | 2.0 | 19.6                                         |

**Figure S10.** Performance values at 35 °C of the ZIF-93@P84 HF membranes placed in a selectivity/permeance diagram for H<sub>2</sub>/CH<sub>4</sub> mixture separation. CO<sub>2</sub>/CH<sub>4</sub> mixture separation performance is also shown in the table. Data from A, B and C-type HFs (bare and annealed P84) are the same as in Table 1.

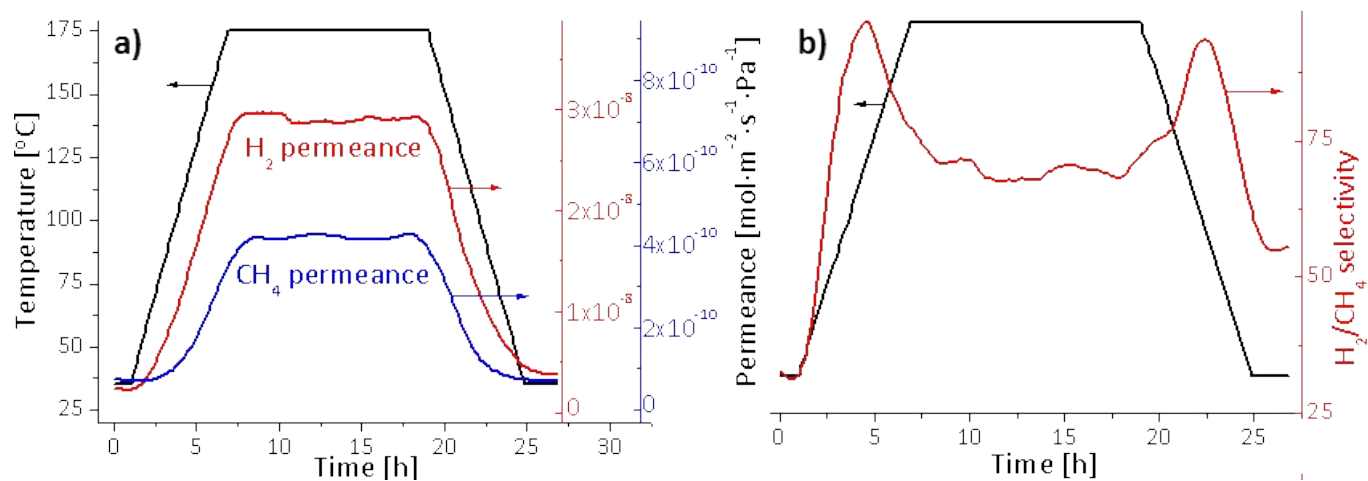

**Figure S11.** H<sub>2</sub> and CH<sub>4</sub> permeance and mixture selectivity dependence with time during *in situ* thermal annealing. A D'-type ZIF-93@P84 HF membrane was heated at 175 °C for 12 h with 6-h heating/cooling stages while separating a H<sub>2</sub>/CH<sub>4</sub> gas mixture swept with Ar, resulting in a G'-type membrane.

**Table S3.** Extended data of HF membranes compared for H<sub>2</sub> purification. The performances obtained in this work are shown with those of other reported MOF-HF supported membranes, pure polyimide HFs and some CMSMs derived from them.

| Ref.      | MOF                     | HF support   | T [°C] | H <sub>2</sub> permeance [GPU] | Sel. H <sub>2</sub> /CH <sub>4</sub>                    | Sel. H <sub>2</sub> /CO <sub>2</sub> |
|-----------|-------------------------|--------------|--------|--------------------------------|---------------------------------------------------------|--------------------------------------|
| 4         | ZIF-90                  | Torlon®      | 35     | 580                            | 3.7                                                     | 1.8                                  |
| 5         | HKUST-1                 | PVDF         | 25     | 5884                           | 5.4                                                     | 8.1                                  |
| 6         | ZIF-7                   | PVDF         | Room   | 7031                           | 20.3<br>(H <sub>2</sub> /N <sub>2</sub> )               | 18.4                                 |
| 6         | ZIF-8                   | PVDF         | Room   | 6016                           | 18.1<br>(H <sub>2</sub> /N <sub>2</sub> )               | 16.3                                 |
| 7         | HKUST-1                 | PSf/<br>PMDS | 20     | 1449                           |                                                         | 21.0                                 |
| 8         | HKUST-1                 | PAN          | 25     | 194743                         |                                                         | 7.1                                  |
| 9         | ZIF-8                   | Torlon®      | 120    | 1090                           | 328<br>(H <sub>2</sub> /C <sub>3</sub> H <sub>8</sub> ) |                                      |
| 10        | HKUST-1                 | PVDF         | Room   | 17957                          |                                                         | 7.9                                  |
| 10        | ZIF-8                   | PVDF         | Room   | 5684                           |                                                         | 12.4                                 |
| 10        | ZIF-7                   | PVDF         | Room   | 3053                           |                                                         | 15.9                                 |
| 11        | NH <sub>2</sub> -MIL-53 | PVDF         | Room   | 16189                          |                                                         | 30.4                                 |
| 12        | ZIF-7                   | PSf          | 35     | 7                              | 34.6                                                    | 2.4                                  |
| 12        | ZIF-8                   | PSf          | 35     | 14                             | 17.2                                                    | 2.6                                  |
| This work | ZIF-93                  | P84®         | 35     | 10                             | 65.0                                                    |                                      |
|           | ZIF-8                   | P84®         | 35     | 39                             | 72.4                                                    |                                      |
|           | ZIF-93                  | P84®         | 100    | 31                             | 101.3                                                   |                                      |
|           | ZIF-8                   | P84®         | 100    | 104                            | 103.1                                                   |                                      |
|           | P84®                    |              | 35     | 429                            | 4.9                                                     |                                      |
| 13,14     | P84®                    |              | 60     | 33                             | 5.0                                                     | 5.4                                  |
| 15        | Matrimid® 5218          |              | 40     | 342                            | 11.2                                                    | 4.0                                  |
| 14        | CMSMs from P84-HF       |              | 60     | 4                              | 5732.6                                                  | 20.9                                 |
| 13        | CMSMs from P84-HF       |              | 60     | 8                              | 843                                                     | 14.9                                 |

## ELECTRONIC SUPPLEMENTARY INFORMATION REFERENCES

1. O. Karvan, J. R. Johnson, P. J. Williams and W. J. Koros, *Chem. Eng. Technol.*, 2013, **36**, 53-61.
2. D. T. Clausi and W. J. Koros, *J. Membr. Sci.*, 2000, **167**, 79-89.
3. Y. Dai, J. R. Johnson, O. Karvan, D. S. Sholl and W. J. Koros, *J. Membr. Sci.*, 2012, **401–402**, 76-82.
4. A. J. Brown, J. R. Johnson, M. E. Lydon, W. J. Koros, C. W. Jones and S. Nair, *Angew. Chem. Int. Ed.*, 2012, **51**, 10615-10618.
5. Y. Mao, J. Li, W. Cao, Y. Ying, L. Sun and X. Peng, *ACS Appl. Mater. Interfaces*, 2014, **6**, 4473-4479.
6. W. Li, Q. Meng, X. Li, C. Zhang, Z. Fan and G. Zhang, *Chem. Commun.*, 2014, **50**, 9711-9713.
7. W. Li, G. Zhang, C. Zhang, Q. Meng, Z. Fan and C. Gao, *Chem. Commun.*, 2014, **50**, 3214-3216.
8. W. Li, Z. Yang, G. Zhang, Z. Fan, Q. Meng, C. Shen and C. Gao, *J. Mater. Chem. A*, 2014, **2**, 2110-2118.
9. A. J. Brown, N. A. Brunelli, K. Eum, F. Rashidi, J. R. Johnson, W. J. Koros, C. W. Jones and S. Nair, *Science*, 2014, **345**, 72-75.
10. W. Li, Q. Meng, C. Zhang and G. Zhang, *Chem. Eur. J.*, 2015, **21**, 7224-7230.
11. W. Li, P. Su, G. Zhang, C. Shen and Q. Meng, *J. Membr. Sci.*, 2015, **495**, 384-391.
12. F. Cacho-Bailo, S. Catalán-Aguirre, M. Etxeberria-Benavides, O. Karvan, V. Sebastian, C. Téllez and J. Coronas, *J. Membr. Sci.*, 2015, **476**, 277-285.
13. E. P. Favvas, E. P. Kouvelos, G. E. Romanos, G. I. Pilatos, A. C. Mitropoulos and N. K. Kanellopoulos, *J. Porous Mater.*, 2008, **15**, 625-633.
14. E. P. Favvas, N. S. Heliopoulos, S. K. Papageorgiou, A. C. Mitropoulos, G. C. Kapantaidakis and N. K. Kanellopoulos, *Sep. Purif. Technol.*, 2015, **142**, 176-181.
15. E. P. Favvas, G. C. Kapantaidakis, J. W. Nolan, A. C. Mitropoulos and N. K. Kanellopoulos, *J. Mater. Process. Technol.*, 2007, **186**, 102-110.
